1 **High prevalence of antibiotic resistance in *Helicobacter pylori* isolates from Iran: importance of functional**  
2 **and mutational analysis of resistance genes and virulence genotyping**

3  
4 **Nastaran Farzi <sup>1</sup>, Abbas Yadegar <sup>1,\*</sup>, Hamid Asadzadeh Aghdaei<sup>2</sup>, Amir Sadeghi<sup>3</sup>, Mohammad Reza**  
5 **Zali<sup>3</sup>**

6  
7 <sup>1</sup>Foodborne and Waterborne Diseases Research Center, Research Institute for Gastroenterology and Liver Diseases,  
8 Shahid Beheshti University of Medical Sciences, Tehran, Iran

9 <sup>2</sup>Basic and Molecular Epidemiology of Gastrointestinal Disorders Research Center, Research Institute for  
10 Gastroenterology and Liver Diseases, Shahid Beheshti University of Medical Sciences, Tehran, Iran

11 <sup>3</sup>Gastroenterology and Liver Diseases Research Center, Research Institute for Gastroenterology and Liver Diseases,  
12 Shahid Beheshti University of Medical Sciences, Tehran, Iran

13  
14 Correspondence: Abbas Yadegar (a.yadegar@sbm.ac.ir)

15 Foodborne and Waterborne Diseases Research Center, Research Institute for Gastroenterology and Liver Diseases,  
16 Shahid Beheshti University of Medical Sciences, Shahid Arabi Ave., Yemen St., Velenjak, Tehran, Iran.

17 Running Head: *H. pylori* resistance genes and virulence genotypes in Iran

18

19

20 **Abstract**

21 The high prevalence of antibiotic resistance in *Helicobacter pylori* has become a great challenge in Iran. The genetic  
22 mutations that contribute to the resistance have yet to be precisely identified. This study aimed to investigate the  
23 prevalence of antibiotic resistance and virulence markers in Iranian *H. pylori* isolates and to analyze if there is any  
24 association between resistance and genotype. Antibiotic susceptibility patterns of 33 *H. pylori* isolates were  
25 investigated against metronidazole, clarithromycin, amoxicillin, rifampicin, ciprofloxacin, levofloxacin and  
26 tetracycline by the agar dilution method. The *frxA*, *rdxA*, *gyrA*, *gyrB* and 23S rRNA genes of the isolates were  
27 sequenced. The virulence genotypes were also determined using PCR. Metronidazole resistance was present in 81.8%  
28 of the isolates, followed by clarithromycin (36.4%), ciprofloxacin (36.4%), amoxicillin (30.3%), rifampicin (30.3%),  
29 levofloxacin (27.3%) and tetracycline (6.1%). Most of the metronidazole-resistant isolates carried frameshift  
30 mutations in both *frxA* and *rdxA* genes, and premature termination was occurred in positions Q5Stop and Q50Stop,  
31 respectively. Amino acid substitutions M191I, G208E, and V199A were predominantly found in *gyrA* gene of  
32 fluoroquinolone-resistant isolates. A2143G and C2195T mutations of 23S rRNA were found in four isolates.  
33 Interestingly, significant associations were demonstrated between intact *cagPAI* and resistance to rifampicin ( $P =$   
34 0.027), and between susceptibility to amoxicillin and *cagPAI* intactness ( $P = 0.016$ ). The prevalence of *H. pylori*  
35 antibiotic resistance is high in our region, particularly that of metronidazole, clarithromycin, ciprofloxacin and multi-  
36 drug resistance. Occurrence of mutations in resistance genes were involved in the development of resistance,  
37 especially in less virulent isolates.

38

39 **Keywords:** *Helicobacter pylori*; Resistance genes; Mutations; Virulence genotype, *cagPAI* intactness

40

41

## 42 **Introduction**

43 *Helicobacter pylori* (*H. pylori*) is known as the most common human pathogen infecting more than half of the world's  
44 population.<sup>1,2</sup> Early eradication based therapies have been proven to regress the *H. pylori*-associated diseases.<sup>3,4</sup>  
45 However, the efficacy of eradication treatments has been extremely compromised primarily due to increased resistance  
46 to antimicrobial agents in many countries.<sup>5-8</sup>

47 Today, first-line standard triple therapy is the most widely used eradication treatment for *H. pylori* infection, which  
48 typically comprises two of three antibiotics including amoxicillin, clarithromycin, and metronidazole in combination  
49 with one proton pump inhibitor (PPI).<sup>3,9</sup> However, the use of levofloxacin or ciprofloxacin in fluoroquinolone  
50 containing triple therapy and bismuth-based quadruple therapy have also been suggested as second-line therapies after  
51 the failure of the clarithromycin-containing regimens.<sup>10-12</sup> Furthermore, tetracycline and rifampicin are among the  
52 common antibiotics that have been used in several rescue therapies recommended in eradication of *H. pylori*  
53 infection.<sup>13-15</sup>

54 Previous studies have demonstrated that numerous point mutations resulting from genetic plasticity within the  
55 chromosomal genes, is the main antibiotic resistance mechanism among *H. pylori* strains in various geographic  
56 regions.<sup>5,6,16-18</sup> Primary resistance to clarithromycin has been mainly associated with point mutations in the peptidyl  
57 transferase region encoded in domain V of 23S rRNA. Most of these mutations include nucleotide substitutions  
58 involving an adenine to guanine transition at positions 2142 and 2143, and to a lesser extent an adenine to cytosine  
59 transversion at position 2142.<sup>8,10,19</sup> However, several other mutations associated with clarithromycin resistant isolates  
60 seem to be emerging.<sup>20,21</sup> The mechanisms of metronidazole resistance in *H. pylori* are frequently attributed to  
61 inactivating mutations in *rdxA* and *frxA* genes.<sup>22,23</sup> On the other hand, mutational changes leading to various amino  
62 acid substitutions that confer fluoroquinolone resistance have been located in different positions of quinolone-resistant  
63 determining region (QRDR) of *gyrA* and *gyrB* genes.<sup>19,24</sup>

64 Apart from aforementioned mechanisms of resistance developed by *H. pylori* strains to the major antibiotics used in  
65 the treatment of infection, other factors such as the virulence genotype status of bacteria have been reported to affect  
66 drug resistance.<sup>25-28</sup> However, the exact underlying mechanisms involved in the crosstalk of *H. pylori* virulence and  
67 antimicrobial resistance remained to be clarified.

68 Hence, the focus of the present study was to evaluate the antibiotic susceptibility patterns and underlying resistance  
69 mechanisms of *H. pylori* strains isolated from Iranian patients with different gastric diseases. Furthermore, we

70 determined the presence of genetic mutations that are associated with antibiotic resistance. We also examined the  
71 possible association between resistance profiles and a panel of virulence genotypes.

## 72 **Methods**

### 73 **Patients and *H. pylori* isolates**

74 Antral biopsies were collected for culture from 78 patients who underwent upper gastroduodenal endoscopy at  
75 Taleghani Hospital in Tehran from February 2016 to September 2016. Patients were excluded if they were taking  
76 eradication therapy for *H. pylori*, PPIs or H<sub>2</sub>-receptor blockers, and any antibiotics used for other infections within  
77 two weeks prior to enrolment. The study protocol was approved by the Ethical Review Committee of the Research  
78 Institute for Gastroenterology and Liver Diseases at Shahid Beheshti University of Medical Sciences (Project No.  
79 IR.SBMU.RIGLD.REC.1395.878). All experiments were performed in accordance with relevant guidelines and  
80 regulations recommended by the institution and informed consents were obtained from all subjects and/or their legal  
81 guardians prior to sample collection.

82 The biopsy specimens were smeared on Brucella agar (Merck, Germany) plates containing 7% horse blood (v/v), 10%  
83 fetal calf serum (FCS), Campylobacter-selective supplement and amphotericin B (2.5 mg/l). The inoculated plates  
84 were incubated at 37°C in a CO<sub>2</sub> incubator under microaerophilic atmosphere containing approximately 5% O<sub>2</sub>, 10%  
85 CO<sub>2</sub> and 85% N<sub>2</sub> for 3-10 days. The *H. pylori* was identified by colony and microscopic morphology, positive catalase,  
86 oxidase, and urease tests and confirmed by molecular assays.<sup>29,30</sup>

### 87 **Antibiotic susceptibility testing**

88 The antibiotic susceptibility of the *H. pylori* strains was assessed by the agar dilution method against a panel of 7  
89 antibiotics purchased from Sigma-Aldrich (St. Louis, MO, USA), including metronidazole (MNZ), clarithromycin  
90 (CLR), amoxicillin (AMX), rifampicin (RIF), ciprofloxacin (CIP), levofloxacin (LEV), and tetracycline (TCN). The  
91 range of antibiotic concentrations was as follows: 0.25-256 mg/L for MNZ, 0.06 to 64 mg/L for CLR, 0.03 to 4 mg/L  
92 for AMX, 0.03 to 32 mg/L for RIF and LEV, 0.06 to 32 mg/L for CIP, and 0.06 to 16 mg/L for TCN. *H. pylori*  
93 inoculums were prepared from 72 h-old cultures that were suspended in sterile saline and adjusted to a density equal  
94 to No. 3 McFarland standard. The bacterial suspensions were inoculated directly onto Mueller-Hinton blood agar  
95 (Merck, Germany) plates supplemented with 10% defibrinated horse blood containing antibiotic dilutions, and were  
96 incubated under microaerophilic conditions as over-mentioned. After 72 hours of incubation, the minimal inhibition  
97 concentrations (MICs) were determined as the lowest concentration of antibiotic that completely inhibited the growth

98 of the inoculums. The resistance breakpoints were used as described by the last guideline of European Committee on  
99 Antimicrobial Susceptibility Testing (EUCAST). Strains were considered to  
100 MNZ, >0.125 mg/L for AMX, and >1 mg/L for RIF, CIP, LEV, and TCN. Clarithromycin MICs were interpreted  
101 based on CLSI breakpoints ( $\leq 0.25$  mg/L, susceptible; 0.5 mg/L; intermediate;  $\geq 1.0$  mg/L, resistant).<sup>31</sup> A clinical isolate  
102 of *H. pylori* with previously identified MIC values was served as a quality control strain in all susceptibility tests.<sup>32</sup>

### 103 **Genomic DNA extraction**

104 Subcultures of the single colonies were prepared, and confluent cultures from each colony were used for DNA  
105 extraction using QIAamp DNA extraction kit (QIAGEN®, Hilden, Germany) following the manufacturer's directions.  
106 The DNA samples were stored at -20 °C until used for gene amplification.

### 107 **Mutation analysis of the resistance genes**

108 To detect specific mutations in the *frxA*, *rdxA*, *gyrA*, *gyrB* and 23S rRNA genes, a PCR-based sequencing approach  
109 was carried out in all *H. pylori* isolates including the susceptible and resistant strains. The *frxA* and *rdxA* genes were  
110 amplified as described by Han et al.<sup>33</sup> Amplification of *gyrA* and *gyrB* genes were performed using primers as  
111 described elsewhere.<sup>34</sup> Mutations within bacterial 23S rRNA peptidyl transferase gene were assessed as presented by  
112 Ho et al.<sup>35</sup> The oligonucleotide primers are shown in Table 1. The PCR products were sequenced on both strands using  
113 an automated sequencer (Macrogen, Seoul, Korea). All complete and partial DNA sequences were edited by Chromas  
114 Lite version 2.5.1 (Technelysium Pty Ltd, Australia). Comparative sequence analysis between resistant and sensitive  
115 strains was carried out using BioEdit software version 7.2.5.<sup>36</sup> The DNA and deduced amino acid sequences were  
116 aligned and coordinated to *H. pylori* 26695 (GenBank: CP003904.1) as a reference sequence.

### 117 **Detection of virulence markers**

118 The presence of virulence factors including *cagA*, *cagL*, *vacA* alleles (s1/s2 and m1/m2), *babA2* and *sabA* genes were  
119 assessed based on our previously published work.<sup>37</sup> The diversity of *cagA* C-terminal variable region and intactness  
120 of *cagPAI* was analysed as previously described.<sup>38</sup> A PCR-sequencing assay was also used to analyse the functional  
121 (on/off) status of *oipA* gene.<sup>29</sup> To investigate the presence of *dupA* gene, we used the previously designed primers by  
122 Jung et al.<sup>39</sup> *H. pylori* J99 (CCUG 47164) and a no-template reaction were used as positive and negative controls in  
123 all amplifications, respectively.

124 Nucleotide sequence accession numbers

125 The sequences obtained from this study were submitted to NCBI under the following GenBank accession numbers:  
126 domain V 23S rRNA, MH040926-MH040949; *gyrA*, MH054262-MH054292; *gyrB*, MH054293-MH054319; *frxA*,  
127 MH054320-MH054346; *rdxA*, MH054347-MH054374.

## 128 **Statistical analysis**

129 The SPSS Statistics for Windows (version 21.0, Armonk, NY: IBM Corp.) was used to perform all statistical analyses.  
130 The Chi-square and Fisher's exact tests were used to determine the statistical significance of differences between  
131 categorical variables. A *P* value of less than 0.05 was considered as statistically significant.

## 132 **Results**

### 133 **Characteristics of patients**

134 Totally, 33 (42.3%) *H. pylori* isolates were cultured from antral biopsies of the patients included in the study. The *H.*  
135 *pylori* infected patients consisted of 14 (42.4%) men and 19 (57.6%) women, with an average age of  $49.7 \pm 9.7$  years  
136 old (range 28-75 years). Endoscopic diagnosis showed that 15 patients had chronic gastritis (CG), 12 had peptic ulcer  
137 disease (PUD), and 6 had intestinal metaplasia (IM).

### 138 **Prevalence of antibiotic resistance**

139 Overall, metronidazole resistance was the highest (27/33, 81.8%), and the lowest resistance rate was observed against  
140 tetracycline in 2/33 (6.1%) isolates. Resistance to clarithromycin, amoxicillin and rifampicin was observed in 12/33  
141 (36.4%), 10/33 (30.3%), and 10/33 (30.3%) of isolates, respectively. Three (9.1%) isolates were found as intermediate  
142 to clarithromycin. *H. pylori* resistance to ciprofloxacin and levofloxacin was detected in 12/33 (36.4%), and 9/33  
143 (27.3%) of isolates, respectively. Only one isolate was found to be susceptible to all antibiotics examined. The rate of  
144 resistance to metronidazole, clarithromycin, amoxicillin and levofloxacin was higher in patients with PUD and IM  
145 than with CG patients. Inversely, the rate of resistance to rifampicin was higher in CG patients than with PUD and  
146 IM. There were no important differences in the rate of resistance to ciprofloxacin and tetracycline between CG and  
147 with PUD and IM patients. All patients with IM were resistant to metronidazole. The MIC range, MIC50/MIC90,  
148 prevalence of resistance and distribution of MIC values for the *H. pylori* strains are shown in Tables 2 and 3.

### 149 **Multi-drug resistance**

150 Single-drug resistance (SDR) was observed in 9 (27.3%) isolates, in which resistance to metronidazole was the most  
151 frequent SDR phenotype (5/9, 55.5%). Totally, 23/33 (69.7%) isolates showed multidrug resistance (MDR)  
152 phenotype, and 16 different MDR profiles were detected. No isolate was resistant to all tested antibiotics. The

153 distribution of the SDR and MDR profiles within various clinical outcome groups is shown in Table 4. Resistance to  
154 MNZ + AMX and MNZ + RIF were equally the most common double-drug resistance profiles (2/6, 33.3%).  
155 Resistance to MNZ + CLR + CIP was found as the most frequent triple-drug resistance profile (3/11, 27.3%). All of  
156 the isolates from patients with IM and more than half of the PUD isolates showed MDR phenotype, mostly having  
157 triple-drug resistance profile.

#### 158 **Genetic variations of *frxA* and *rdxA* genes**

159 Totally, 27 of the *frxA* and 28 of the *rdxA* genes obtained from all isolates were sequenced and analysed as shown in  
160 Table 5. Fourteen (51.8%) isolates exhibiting resistance to metronidazole predominantly carried insertions and/or  
161 deletions resulting in translational frameshift mutations in the FrxA. One isolate was found to have stop codon at  
162 position Q5Stop resulting in premature termination codon (PTC), while missense mutations were found in 11/27  
163 (40.7%) isolates. In addition, about one-third (10/28, 35.7%) of the isolates were found to have frameshift mutations  
164 in *rdxA* gene. Nonsense mutations resulting in PTC were identified in 3/28 (10.7%) isolates due to codon substitutions  
165 at position Q50Stop of RdxA. Missense mutations were distributed among 5 susceptible and 10 resistant isolates of  
166 the *rdxA* genes. One resistant strain had no mutation in both genes. The peptide sequence alignments for *frxA* and  
167 *rdxA* genes from metronidazole-susceptible and -resistant isolates in comparison with reference strain are presented  
168 in Supplementary Figs S1 and S2, respectively.

#### 169 **Amino acid variations at QRDR region of *gyrA* and *gyrB* genes**

170 As shown in Table 6 and Supplementary Figs S3 and S4, selective regions in the QRDR of *gyrA* and *gyrB* genes were  
171 sequenced among 31 and 27 *H. pylori* isolates, respectively. Totally, 16 different amino acid substitutions were  
172 detected in *gyrA* subunit among all isolates. Three different amino acid variants including S63P, R140K, and A183V  
173 were detected to be exclusively present in *gyrA* of the fluoroquinolone-resistant isolates, whereas six different  
174 substitutions of A97V, D143E, A207T, G208K, I212S, and E214K were found to be present in the susceptible isolates  
175 only. In addition, seven other mutations were observed at D86N, D86G, V150A, M191I, V199A, G208A, and G208E  
176 in both fluoroquinolone-susceptible and -resistant isolates. The most frequent substitutions in *gyrA* of the  
177 fluoroquinolone-resistant isolates were M191I (14/23, 60.9%), G208E (13/25, 52%), and V199A (5/9, 55.5%),  
178 respectively. The M191I-G208E substitution was found as the most common double mutations (8/12, 66.7%) within  
179 5 resistant and 3 susceptible isolates, while the M191I-V199A-G208E was found as the most frequent triple

180 substitutions (3/9, 33.3%) from 2 susceptible and one resistant isolates. The quadruple substitution was detected in  
181 *gyrA* of 3 resistant and 3 susceptible isolates.

182 As for *gyrB* subunit, two different amino acid variants including D481E and R484K were detected among 7 isolates.  
183 The D481E substitution was found to be present in both fluoroquinolone-susceptible and -resistant isolates, whereas  
184 R484K was exclusively present in resistant isolates. As shown in Table 6 and Supplementary Fig S4, two  
185 fluoroquinolone-susceptible isolates had the single D481E mutations, while 5 resistant isolates presented the double  
186 D481E-R484K only. No mutation of *gyrB* was found in 11 fluoroquinolone-resistant and 9 susceptible isolates.

### 187 **Genetic variations of 23S rRNA gene**

188 The domain V of 23S rRNA gene was sequenced in 24 *H. pylori* isolates. As shown in Supplementary Fig S5, this  
189 region was highly conserved with minimal nucleotide variations in comparison to *H. pylori* strain 26695 as the  
190 reference genome. Overall, four nucleotide transitions including A2143G and C2195T were identified in  
191 clarithromycin-resistant isolates. None of these mutations were observed among the susceptible isolates and no  
192 isolates were found to have double mutations of A2143G and C2195T. The distribution of MIC values according to  
193 the different mutations in all phenotypically resistant and susceptible isolates is presented in Table 7.

### 194 **Association between virulence genotypes and resistance patterns**

195 The frequency and distribution of strains grouped by virulence genotypes according to each susceptibility pattern is  
196 shown in Table 8. High frequencies of *cagL*-positive and *cagA*-positive genotypes were found frequently in  
197 susceptible isolates for all antibiotics tested, with the exception of metronidazole. The *cagA* ABC motif was also found  
198 frequently in susceptible isolates, with the exception of metronidazole and clarithromycin. *H. pylori* isolates with *vacA*  
199 s1m2 were found more frequently in susceptible isolates. Strains with *oipA* “on” status and *babA*, *sabA* and *dupA*  
200 positivity were also frequently found in susceptible isolates. There were only two isolates that showed resistance  
201 against tetracycline and both these strains also were *sabA*-positive. All ciprofloxacin-resistant isolates also were found  
202 to be *dupA*-positive. There was no association between these virulence factors and antibiotic resistance patterns ( $P >$   
203 0.05). Furthermore, *H. pylori* strains harboring intact or partial *cagPAI* were variably distributed between susceptible  
204 and resistant isolates. Interestingly, significant associations were observed between intact *cagPAI* and resistance to  
205 rifampicin ( $P = 0.027$ ), and between susceptibility to amoxicillin and *cagPAI* intactness ( $P = 0.016$ ).

### 206 **Discussion**



207 Eradication of *H. pylori* infection has been reported to significantly improve the clinical outcome of infected patients  
208 in high-risk areas.<sup>3,40</sup> However, the eradication rate of *H. pylori* has been decreasing progressively, mainly due to  
209 increased resistance to antimicrobial agents, especially in developing countries.<sup>5,6,11,17,41-43</sup> Thus, in order to choose the  
210 appropriate antibiotics in different *H. pylori* treatment regimens, we need to have recently updated susceptibility data  
211 in the local setting. In Iran, nearly 40-90% of the adult population is infected with *H. pylori*, which seems to be  
212 acquired early in childhood.<sup>32,37,44</sup> There have been few reports on the antibiotic resistance of *H. pylori* in Iran by  
213 performing agar dilution method as the reference method for this bacterium.<sup>32,45-47</sup> However, none of the previous  
214 studies investigated the functional and molecular mechanisms that contribute to resistance of *H. pylori* strains from  
215 Iranian patients. Therefore, we carried out this work to determine the molecular characteristics of genes involved in  
216 antibiotic resistance, and evaluate the association between resistance patterns and a wide panel of virulence genotypes.  
217 The prevalence of metronidazole resistance was reported to be high among Iranian *H. pylori* strains and ranged from  
218 40.5% to 78.6%.<sup>45,47,48</sup> The results of this study showed an increased rate of metronidazole resistance (81.8%) as  
219 compared to previous reports from Iran.<sup>32,45,47</sup> A very high prevalence of metronidazole resistance has also been  
220 reported from other developing countries in Asia including Bangladesh (77.5%), China (95.4%), India (83.8%),  
221 Kuwait (70%), Pakistan (89%), and Vietnam (69.9%).<sup>43,49-53</sup> The extremely high rate of metronidazole resistance  
222 observed in this study might be attributed to widespread and unauthorized consumption of antimicrobial drugs in Iran.  
223 In addition, massive use of metronidazole in the treatment of various infections such as anaerobic bacterial and  
224 parasitic infections, and for diarrheal, dental, periodontal, and gynecologic diseases could explain the significantly  
225 high rate of metronidazole resistance in many developing countries.<sup>5,32,41,43</sup> Therefore, in agreement with other  
226 previous studies *H. pylori* treatment regimens containing metronidazole are not useful and should not be chosen as  
227 first-line eradication therapy in Iran.<sup>5,41-43,54</sup>  
228 Previous studies demonstrated that various point mutations in *frxA* and *rdxA* genes were linked to metronidazole  
229 resistance in *H. pylori*.<sup>23,51,55</sup> As expected, different types of mutations including insertions, deletions, missense,  
230 nonsense and frameshift mutations were detected among the studied strains. Our results showed that most of the  
231 metronidazole-resistant isolates presented frameshift mutations in these genes. Moreover, we found point mutations  
232 introducing stop codon at positions Q5Stop and Q50Stop in *frxA* and *rdxA* genes, respectively. Many other nonsense  
233 mutations that lead to PTC have also been reported in *rdxA* and rarely in *frxA* genes.<sup>5,17,22,33,41,56,57</sup> However, in this  
234 study one of the metronidazole-resistant isolate did not contain any alterations in both *frxA* and *rdxA* genes. As

235 previously suggested, metronidazole resistance in this small subset of isolates may be due to the presence of additional  
236 resistance mechanisms and mutations in other redox enzymes.<sup>33,41,58</sup>

237 Fluoroquinolones were proven to have bacteriostatic activities by trapping DNA gyrase and topoisomerase IV. These  
238 drugs considered as salvage treatment for *H. pylori* eradication in second- or third-line therapies after the failure of  
239 clarithromycin-based treatment regimens.<sup>12,24,59</sup> However, it has been reported that fluoroquinolone resistance is  
240 rapidly expanding around the world.<sup>6,7,53</sup> In a previous study from Iran, the rate of resistance to ciprofloxacin and  
241 levofloxacin was reported about 27% and 24.3%, respectively.<sup>32</sup> In this study, we found a significant increase of  
242 fluoroquinolone resistance, which is of great concern. Nevertheless, studies from Taiwanese and Malaysian  
243 populations revealed that gemifloxacin is superior to levofloxacin in antimicrobial activity and may have better drug  
244 efficacy than levofloxacin in *H. pylori* eradication.<sup>41,60</sup>

245 Point mutations in the QRDR of *gyrA* and *gyrB* sequences, greatly reduce the antimicrobial activity of  
246 fluoroquinolones. To date, several mutations have been identified in *gyrA* subunit of *H. pylori* strains from different  
247 geographical regions.<sup>5,8,34,41,60-64</sup> None of the most common mutations in *gyrA* hot spot positions N87K, D91N, and  
248 D91G were detected in our isolates. However, 10 novel substitutions including S63P, D143E, A183V, A207T, G208K,  
249 G208A, G208E, I212S, E214K, and M191I were identified in the *gyrA* of either/both fluoroquinolone-resistant or/and  
250 -susceptible strains in this study. Among them mutations M191I, G208E, and V199A were predominantly found in  
251 fluoroquinolone-resistant isolates. Moreover, *gyrB* mutations may rarely occur and have little impact on primary  
252 fluoroquinolone resistance.<sup>5,8,34,41,61,64</sup> In this study, only two amino acid changes D481E and R484K were identified  
253 in *gyrB*, in which R484K was exclusively present in resistant strains.

254 Among macrolides, clarithromycin is recognized as a major antibiotic for *H. pylori* eradication therapy because of its  
255 impact on treatment outcomes.<sup>20,65</sup> The rate of clarithromycin resistance is typically much lower than that to  
256 metronidazole. However, the rate of primary clarithromycin resistance is undoubtedly on the rise and varies between  
257 different geographical regions.<sup>7,8,43,53,66</sup> Unfortunately, the level of clarithromycin resistance in this study increased in  
258 comparison to a previous study<sup>32</sup> from 26 to 36.4%, which is of great concern.

259 It has been claimed that three most frequently reported mutations, including A2143G, A2142G and A2142C, are  
260 responsible for more than 90% cases of primary resistance to clarithromycin.<sup>67,68</sup> However, in a recent study by De  
261 Francesco *et al.* this concordance was reduced to only 54.8%, with the A2142C mutation not being detected at all.<sup>20</sup>  
262 Moreover, some other mutations have been found to be associated with clarithromycin resistance, although their

263 precise role is not yet clear.<sup>69</sup> In this study, only four mutations including A2143G and C2195T were found in our  
264 isolates. We failed to identify additional mutations such as T2183C and A2223G, which are frequently reported to be  
265 the cause of clarithromycin resistance in Eastern countries, rather than in Western countries.<sup>70</sup> Additionally, no point  
266 mutation was identified in the sequence of 23S rRNA gene in four clarithromycin-resistant strains. For those isolates,  
267 we can speculate that other resistance mechanisms, such as the presence of an efflux pump, may be implicated in  
268 development of resistance to clarithromycin.<sup>71</sup>

269 It is estimated that the overall resistance rates to amoxicillin and tetracycline are 23.61% and 7.38% in Asian countries,  
270 respectively.<sup>48</sup> Similarly, we observed high rate of resistance to these drugs among the studied isolates (30.3% to  
271 amoxicillin and 6.1% to tetracycline), which is a matter of great concern in *H. pylori* eradication in Iran. However,  
272 the level of resistance to these antibiotics reported to be very low or even absent in most western countries versus  
273 African countries.<sup>69,72</sup> Regarding rifampicin, we also observed a rising rate of resistance from 14.4% to 30.3% in  
274 comparison to a previous report.<sup>32</sup> Recently, Regnath *et al.* reported considerable increase in resistance to rifampicin  
275 from 3.9% to 18.8% between 2002 and 2015 among pediatric patients from southwest Germany.<sup>73</sup>

276 Unfortunately, emergence of MDR *H. pylori* strains has become a serious challenge all over the world. In a previous  
277 study, the resistance rate to at least two antimicrobial agents was reported in 43% of the *H. pylori* isolates from Iran.  
278 Surprisingly, our finding showed that 69.7% of the isolates were resistant to at least two antibiotics. The high  
279 prevalence of MDR phenotype may be attributed to the exhaustive use of antibiotics across the country. Information  
280 about the prevalence of quadruple-drug resistance is limited, and a few reports from India (2.5%), Bulgaria (0.7%),  
281 Vietnam (1.9%) and Indonesia (2.6%) are available yet.<sup>5,43,74,75</sup> However, 18.7% of the isolates in this study showed  
282 quadruple-drug resistance, which was lower than the previous study (37.9%).<sup>32</sup> Moreover, resistance to tetracycline  
283 was only observed in the isolates with quadruple-drug resistance. This finding could be explained to the presence of  
284 multidrug efflux pumps in these strains.<sup>69</sup>

285 There have been several reports on the relationship between *H. pylori* virulence markers and antibiotic resistance.  
286 Accordingly, patients infected with *cagA*-positive strains that also carry more virulent *vacA* alleles significantly have  
287 high cure rates and eradication success than less virulent strains.<sup>26,76-78</sup> It has been hypothesized that colonization of  
288 gastric mucosa by more virulent *H. pylori* genotypes may induce a higher degree of inflammation and increase blood  
289 flow, which in turn can favor better diffusion of the antibiotics.<sup>27,78</sup> Alternatively, another possible explanation may  
290 be related to the fact that *cagA*-positive strains proliferate faster than *cagA*-negative ones and would therefore be more

291 susceptible to antibiotics.<sup>25,76</sup> Furthermore, Taneike *et al.* observed that *cagA*-negative strains may tend to acquire  
292 spontaneous drug resistance under selective pressure of antimicrobials.<sup>25</sup> However, it still remains somewhat  
293 controversial because recent reports indicated that these virulent genotypes variously distributed between susceptible  
294 and resistant strains.<sup>5,28,79-81</sup> CagA protein with a greater number of EPIYA-C repeats is considered to be  
295 pathophysiologically more virulent and carcinogenic.<sup>82</sup> Thus, according to the over-mentioned hypothesis, we  
296 expected the presence of more virulent types of CagA EPIYA motifs in susceptible isolates than resistant ones.  
297 However, as the number of EPIYA types having two or more EPIYA-C repeats was very low, we could not come to  
298 such conclusion. Similar to other studies performed in Italy (37.2%)<sup>83</sup>, North Wales (53%)<sup>84</sup> and Germany (37.4%)<sup>77</sup>,  
299 *vacA* s1m2 (48.5%) genotype was the most prevalent *vacA* mosaicisms in our strains. Although *H. pylori* strains with  
300 *vacA* s1m2 were detected more frequently in metronidazole-resistant isolates, no significant associations was found.  
301 In contrast, *vacA* s1m2 genotype was found more frequently in susceptible isolates for other antibiotics examined.  
302 Likewise, isolates with *oipA* “on” status and harboring *babA*, *sabA* and *dupA* genotypes were frequently found in  
303 metronidazole-resistant isolates. On the other hand, all of these genotypes were frequently found in susceptible isolates  
304 for other antibiotics, with the exception of *sabA* in levofloxacin-resistant ones. Moreover, two isolates that showed  
305 resistance against tetracycline were *sabA*-positive, and all ciprofloxacin-resistant isolates were found to be *dupA*-  
306 positive. However, we found no association between these virulence factors and antibiotics resistance ( $P > 0.05$ ). *H.*  
307 *pylori* strains that carry an intact and functional *cagPAI* are more virulent and frequently associated with severe clinical  
308 outcomes than those carrying partial or no *cagPAI*.<sup>30,38</sup> As far as we know, this is the first study that relates the *cagPAI*  
309 integrity with antibiotic resistance. Our results showed that *H. pylori* isolates harboring intact or partial *cagPAI* were  
310 variably distributed between susceptible and resistant isolates. However, we found significant associations between  
311 intact *cagPAI* and resistance to rifampicin ( $P = 0.027$ ), and contrastingly between susceptibility to amoxicillin and  
312 *cagPAI* intactness ( $P = 0.016$ ). These results are contradictory and did not strongly support the idea that susceptibility  
313 to antibiotics is higher in infections caused by more virulent genotypes. Nevertheless, it is likely that infected patients  
314 with resistant and hypervirulent strains are at increased risk of progression to more severe clinical outcomes due to  
315 failure in *H. pylori* eradication.

316 In conclusion, this study demonstrated that the prevalence of *H. pylori* antibiotic resistance is worrisome in our country  
317 with rising trend over the time. The findings from this study also highlight the relevance of different types of mutations  
318 in genes responsible for antibiotic resistance in *H. pylori* strains. We also provide evidence for the importance of

319 simultaneous screening of the virulence and resistance genotypes in *H. pylori* strains for guiding clinicians to choose  
320 an appropriate combination of drugs. Taken together, because of alarming increase in the rate of *H. pylori* antibiotic  
321 resistance in our local population, it is reasonable to constantly monitor the antimicrobial susceptibility patterns, and  
322 develop effective treatment and preventive strategies at national level.

### 323 **Acknowledgements**

324 This study was supported by a grant (no. RIGLD 878) from Research Institute for Gastroenterology and Liver  
325 Diseases, Shahid Beheshti University of Medical Sciences, Tehran, Iran.

### 326 **Author Contributions**

327 N. Farzi collected the *H. pylori* strains, performed the susceptibility testing and molecular assays. A. Yadegar worked  
328 on concept and design of the study, data analysis and interpretation, and writing of manuscript. A. Sadeghi, H.  
329 Asadzadeh Aghdaei, and M. R. Zali critically revised the paper. All authors approved the final version of the  
330 manuscript and the authorship list.

### 331 **Supplementary Information**

332 Supplementary information associated with this article can be found, in the online version.

333

334 **References**

- 335 1. Backert S, Neddermann M, Maubach G *et al.* Pathogenesis of *Helicobacter pylori* infection. *Helicobacter* 2016;21  
336 Suppl 1:19-25.
- 337 2. Rowland M, Daly L, Vaughan M *et al.* Age-specific incidence of *Helicobacter pylori*. *Gastroenterology*  
338 2006;130:65-72; quiz 211.
- 339 3. Malfertheiner P, Megraud F, O'Morain CA *et al.* Management of *Helicobacter pylori* infection-the Maastricht  
340 V/Florence Consensus Report. *Gut* 2017;66:6-30.
- 341 4. Wu CY, Kuo KN, Wu MS *et al.* Early *Helicobacter pylori* eradication decreases risk of gastric cancer in patients  
342 with peptic ulcer disease. *Gastroenterology* 2009;137:1641-48.
- 343 5. Miftahussurur M, Syam AF, Nusi IA *et al.* Surveillance of *Helicobacter pylori* antibiotic susceptibility in Indonesia:  
344 different resistance types among regions and with novel genetic mutations. *PloS One* 2016;11:e0166199.
- 345 6. Ngoyi O, Nina E, Atipo Ibara BI *et al.* Molecular detection of *Helicobacter pylori* and its antimicrobial resistance  
346 in Brazzaville, Congo. *Helicobacter* 2015;20:316-20.
- 347 7. Lee JW, Kim N, Kim JM *et al.* Prevalence of primary and secondary antimicrobial resistance of *Helicobacter pylori*  
348 in Korea from 2003 through 2012. *Helicobacter* 2013;18:206-14.
- 349 8. Zerbetto De Palma G, Mendiondo N, Wonaga A *et al.* Occurrence of mutations in the antimicrobial target genes  
350 related to levofloxacin, clarithromycin, and amoxicillin resistance in *Helicobacter pylori* isolates from Buenos  
351 Aires city. *Microb Drug Resist* 2017;23:351-8.
- 352 9. Mahachai V, Vilaichone RK, Pittayanon R *et al.* *Helicobacter pylori* management in ASEAN: The Bangkok  
353 consensus report. *J Gastroenterol Hepatol* 2018;33:37-56.
- 354 10. Mégraud F. The challenge of *Helicobacter pylori* resistance to antibiotics: the comeback of bismuth-based  
355 quadruple therapy. *Therap Adv Gastroenterol* 2012;5:103-9.
- 356 11. Kuo CH, Hsu PI, Kuo FC *et al.* Comparison of 10 day bismuth quadruple therapy with high-dose metronidazole  
357 or levofloxacin for second-line *Helicobacter pylori* therapy: a randomized controlled trial. *J Antimicrob Chemother*  
358 2013;68:222-8.
- 359 12. Gisbert JP, Romano M, Gravina AG *et al.* *Helicobacter pylori* second-line rescue therapy with levofloxacin- and  
360 bismuth-containing quadruple therapy, after failure of standard triple or non-bismuth quadruple treatments.  
361 *Aliment Pharmacol Ther* 2015;41:768-75.

- 362 13. Cianci R, Montalto M, Pandolfi F *et al.* Third-line rescue therapy for *Helicobacter pylori* infection. *World J*  
363 *Gastroenterol* 2006;12:2313-19.
- 364 14. Delchier JC, Malfertheiner P, Thieroff-Ekerdt R. Use of a combination formulation of bismuth, metronidazole and  
365 tetracycline with omeprazole as a rescue therapy for eradication of *Helicobacter pylori*. *Aliment Pharmacol Ther*  
366 2014;40:171-7.
- 367 15. Chen Q, Zhang W, Fu Q, *et al.* Rescue therapy for *Helicobacter pylori* eradication: a randomized non-inferiority  
368 trial of amoxicillin or tetracycline in bismuth quadruple therapy. *Am J Gastroenterol* 2016;111:1736-42.
- 369 16. Miftahussurur M, Shrestha PK, Subsomwong P *et al.* Emerging *Helicobacter pylori* levofloxacin resistance and  
370 novel genetic mutation in Nepal. *BMC Microbiol* 2016;16:256.
- 371 17. Alfizah H, Norazah A, Hamizah R *et al.* Resistotype of *Helicobacter pylori* isolates: the impact on eradication  
372 outcome. *J Med Microbiol* 2014;63:703-9.
- 373 18. Secka O, Berg DE, Antonio M *et al.* Antimicrobial susceptibility and resistance patterns among *Helicobacter*  
374 *pylori* strains from the Gambia, West Africa. *Antimicrob Agents Chemother* 2013;57:1231-7.
- 375 19. Nishizawa T, Suzuki H. Mechanisms of *Helicobacter pylori* antibiotic resistance and molecular testing. *Front Mol*  
376 *Biosci* 2014;1:19.
- 377 20. De Francesco V, Zullo A, Giorgio F *et al.* Change of point mutations in *Helicobacter pylori* rRNA associated with  
378 clarithromycin resistance in Italy. *J Med Microbiol* 2014;63:453-7.
- 379 21. Rimbara E, Noguchi N, Kawai T *et al.* Novel mutation in 23S rRNA that confers low-level resistance to  
380 clarithromycin in *Helicobacter pylori*. *Antimicrob Agents Chemother* 2008;52:3465-6.
- 381 22. Matteo MJ, Perez CV, Domingo MR *et al.* DNA sequence analysis of *rdxA* and *frxA* from paired metronidazole-  
382 sensitive and -resistant *Helicobacter pylori* isolates obtained from patients with heteroresistance. *Int J Antimicrob*  
383 *Agents* 2006;27:152-8.
- 384 23. Masaoka T, Suzuki H, Kurabayashi K *et al.* Could frameshift mutations in the *frxA* and *rdxA* genes of *Helicobacter*  
385 *pylori* be a marker for metronidazole resistance? *Aliment Pharmacol Ther symp ser* 2006;2:81-7.
- 386 24. Rimbara E, Noguchi N, Kawai T, Sasatsu M. Fluoroquinolone resistance in *Helicobacter pylori*: role of mutations  
387 at position 87 and 91 of *GyrA* on the level of resistance and identification of a resistance conferring mutation in  
388 *GyrB*. *Helicobacter* 2012;17:36-42.

- 389 25. Taneike I, Nami A, O'Connor A *et al.* Analysis of drug resistance and virulence-factor genotype of Irish  
390 *Helicobacter pylori* strains: is there any relationship between resistance to metronidazole and *cagA* status? *Aliment*  
391 *Pharmacol Ther* 2009;30:784-90.
- 392 26. Suzuki T, Matsuo K, Sawaki A *et al.* Systematic review and meta-analysis: importance of CagA status for  
393 successful eradication of *Helicobacter pylori* infection. *Aliment Pharmacol Ther* 2006;24:273-80.
- 394 27. Agudo S, Perez-Perez G, Alarcon T *et al.* High prevalence of clarithromycin-resistant *Helicobacter pylori* strains  
395 and risk factors associated with resistance in Madrid, Spain. *J Clin Microbiol* 2010;48:3703-7.
- 396 28. Fasciana T, Cala C, Bonura C *et al.* Resistance to clarithromycin and genotypes in *Helicobacter pylori* strains  
397 isolated in Sicily. *J Med Microbiol* 2015;64:1408-14.
- 398 29. Farzi N, Yadegar A, Aghdaei HA *et al.* Genetic diversity and functional analysis of *oipA* gene in association with  
399 other virulence factors among *Helicobacter pylori* isolates from Iranian patients with different gastric diseases.  
400 *Infect Genet Evol* 2018;60:26-34.
- 401 30. Ahmadzadeh A, Ghalehnoei H, Farzi N, *et al.* Association of *CagPAI* integrity with severeness of *Helicobacter*  
402 *pylori* infection in patients with gastritis. *Pathol Biol* 2015;63:252-7.
- 403 31. Clinical and Laboratory Standards Institute. Methods for antimicrobial dilution and disk susceptibility testing of  
404 infrequently isolated or fastidious bacteria-3rd ed. Document M45. CLSI, Wayne, PA, USA, 2015.
- 405 32. Shokrzadeh L, Alebouyeh M, Mirzaei T *et al.* Prevalence of multiple drug-resistant *Helicobacter pylori* strains  
406 among patients with different gastric disorders in Iran. *Microb Drug Resist* 2015;21:105-10.
- 407 33. Han F, Liu S, Ho B *et al.* Alterations in *rdxA* and *frxA* genes and their upstream regions in metronidazole-resistant  
408 *Helicobacter pylori* isolates. *Res Microbiol* 2007;158:38-44.
- 409 34. Wang L-H, Cheng H, Hu F-L, Li J. Distribution of *gyrA* mutations in fluoroquinolone-resistant *Helicobacter pylori*  
410 strains. *World J Gastroenterol* 2010;16:2272-7.
- 411 35. HO SL, Tan EL, Sam CK *et al.* Clarithromycin resistance and point mutations in the 23S rRNA gene in  
412 *Helicobacter pylori* isolates from Malaysia. *J Dig Dis* 2010;11:101-5.
- 413 36. Hall TA. BioEdit: a user-friendly biological sequence alignment editor and analysis program for Windows  
414 95/98/NT. *Nucl Acids Symp Ser* 1999;41:95-8.



- 415 37. Yadegar A, Mobarez AM, Alebouyeh M *et al.* Clinical relevance of *cagL* gene and virulence genotypes with  
416 disease outcomes in a *Helicobacter pylori* infected population from Iran. *World J Microbiol Biotechnol*  
417 2014;30:2481-90.
- 418 38. Yadegar A, Alebouyeh M, Zali MR. Analysis of the intactness of *Helicobacter pylori* *cag* pathogenicity island in  
419 Iranian strains by a new PCR-based strategy and its relationship with virulence genotypes and EPIYA motifs. *Infect*  
420 *Genet Evol* 2015;35:19-26.
- 421 39. Jung SW, Sugimoto M, Shiota S *et al.* The intact *dupA* cluster is a more reliable *Helicobacter pylori* virulence  
422 marker than *dupA* alone. *Infect Immun* 2012;80:381-7.
- 423 40. Lee YC, Chiang TH, Chou CK *et al.* Association between *Helicobacter pylori* eradication and gastric cancer  
424 incidence: a systematic review and meta-analysis. *Gastroenterology* 2016;150:1113-24.
- 425 41. Teh X, Khosravi Y, Lee WC *et al.* Functional and molecular surveillance of *Helicobacter pylori* antibiotic  
426 resistance in Kuala Lumpur. *PloS One* 2014;9:e101481.
- 427 42. Goh KL, Navaratnam P. High *Helicobacter pylori* resistance to metronidazole but zero or low resistance to  
428 clarithromycin, levofloxacin, and other antibiotics in Malaysia. *Helicobacter* 2011;16:241-5.
- 429 43. Binh TT, Shiota S, Nguyen LT *et al.* The incidence of primary antibiotic resistance of *Helicobacter pylori* in  
430 Vietnam. *J Clin Gastroenterol* 2013;47:233-8.
- 431 44. Hosseini E, Poursina F, de Wiele TV *et al.* *Helicobacter pylori* in Iran: a systematic review on the association of  
432 genotypes and gastroduodenal diseases. *J Res Med Sci* 2012;17:280-92.
- 433 45. Talebi Bezmin Abadi A, Ghasemzadeh A, Taghvaei T *et al.* Primary resistance of *Helicobacter pylori* to  
434 levofloxacin and moxifloxacin in Iran. *Intern Emerg Med* 2012;7:447-52.
- 435 46. Kohanteb J, Bazargani A, Saberi-Firoozi M *et al.* Antimicrobial susceptibility testing of *Helicobacter pylori* to  
436 selected agents by agar dilution method in Shiraz-Iran. *Indian J Med Microbiol* 2007;25:374-7.
- 437 47. Shokrzadeh L, Jafari F, Dabiri H *et al.* Antibiotic susceptibility profile of *Helicobacter pylori* isolated from the  
438 dyspepsia patients in Tehran, Iran. *Saudi J Gastroenterol* 2011;17:261-4.
- 439 48. Ghotaslou R, Leylabadlo HE, Asl YM. Prevalence of antibiotic resistance in *Helicobacter pylori*: A recent  
440 literature review. *World J Methodol* 2015;5:164-74.
- 441 49. Nahar S, Mukhopadhyay AK, Khan R *et al.* Antimicrobial susceptibility of *Helicobacter pylori* strains isolated in  
442 Bangladesh. *J Clin Microbiol* 2004;42:4856-8.

- 443 50. Pandya HB, Agravat HH, Patel JS *et al.* Emerging antimicrobial resistance pattern of *Helicobacter pylori* in  
444 central Gujarat. *Indian J Med Microbiol* 2014;32:408-13.
- 445 51. John Albert M, Al-Mekhaizeem K, Neil L *et al.* High prevalence and level of resistance to metronidazole, but lack  
446 of resistance to other antimicrobials in *Helicobacter pylori*, isolated from a multiracial population in Kuwait.  
447 *Aliment Pharmacol Ther* 2006;24:1359-66.
- 448 52. Khan A, Farooqui A, Manzoor H, Akhtar SS, Quraishy MS, Kazmi SU. Antibiotic resistance and *cagA* gene  
449 correlation: a looming crisis of *Helicobacter pylori*. *World J Gastroenterol* 2012;18:2245-52.
- 450 53. Su P, Li Y, Li H *et al.* Antibiotic resistance of *Helicobacter pylori* isolated in the southeast coastal region of China.  
451 *Helicobacter* 2013;18:274-9.
- 452 54. Ahmad N, Zakaria WR, Mohamed R. Analysis of antibiotic susceptibility patterns of *Helicobacter pylori* isolates  
453 from Malaysia. *Helicobacter* 2011;16:47-51.
- 454 55. Gerrits MM, Van der Wouden E-J *et al.* Role of the *rdxA* and *frxA* genes in oxygen-dependent metronidazole  
455 resistance of *Helicobacter pylori*. *J Med Microbiol* 2004;53:1123-8.
- 456 56. Marais A, Bilardi C, Cantet F *et al.* Characterization of the genes *rdxA* and *frxA* involved in metronidazole  
457 resistance in *Helicobacter pylori*. *Res Microbiol* 2003;154:137-44.
- 458 57. Yang YJ, Wu JJ, Sheu BS *et al.* The *rdxA* gene plays a more major role than *frxA* gene mutation in high-level  
459 metronidazole resistance of *Helicobacter pylori* in Taiwan. *Helicobacter* 2004;9:400-7.
- 460 58 Chisholm SA, Owen RJ. Mutations in *Helicobacter pylori* *rdxA* gene sequences may not contribute to  
461 metronidazole resistance. *J Antimicrob Chemother* 2003;51:995-9.
- 462 59. Goh KL, Manikam J, Qua CS. High-dose rabeprazole-amoxicillin dual therapy and rabeprazole triple therapy with  
463 amoxicillin and levofloxacin for 2 weeks as first and second line rescue therapies for *Helicobacter pylori* treatment  
464 failures. *Aliment Pharmacol Ther* 2012;35:1097-102.
- 465 60. Chang WL, Kao CY, Wu CT *et al.* Gemifloxacin can partially overcome quinolone resistance of *H. pylori* with  
466 *gyrA* mutation in Taiwan. *Helicobacter* 2012;17:210-5.
- 467 61. Trespacios-Rangel AA, Otero W *et al.* Surveillance of levofloxacin resistance in *Helicobacter pylori* isolates in  
468 Bogota-Colombia (2009-2014). *PloS One* 2016;11:e0160007.

- 469 62. Cattoir V, Nectoux J, Lascols C, *et al.* Update on fluoroquinolone resistance in *Helicobacter pylori*: new mutations  
470 leading to resistance and first description of a *gyrA* polymorphism associated with hypersusceptibility. *Int J*  
471 *Antimicrob Agents* 2007;29:389-96.
- 472 63. Garcia M, Raymond J, Garnier M *et al.* Distribution of spontaneous *gyrA* mutations in 97 fluoroquinolone-resistant  
473 *Helicobacter pylori* isolates collected in France. *Antimicrob Agents Chemother* 2012;56:550-1.
- 474 64. Miyachi H, Miki I, Aoyama N *et al.* Primary levofloxacin resistance and *gyrA/B* mutations among *Helicobacter*  
475 *pylori* in Japan. *Helicobacter* 2006;11:243-9.
- 476 65. Mégraud F. Current recommendations for *Helicobacter pylori* therapies in a world of evolving resistance. *Gut*  
477 *Microbes* 2013;4:541-8.
- 478 66. Cuadrado-Lavin A, Salcines-Caviedes JR, Carrascosa MF *et al.* Antimicrobial susceptibility of *Helicobacter*  
479 *pylori* to six antibiotics currently used in Spain. *J Antimicrob Chemother* 2012;67:170-3.
- 480 67. Wueppenhorst N, Stueger HP, Kist M *et al.* Identification and molecular characterization of triple- and quadruple-  
481 resistant *Helicobacter pylori* clinical isolates in Germany. *J Antimicrob Chemother* 2009;63:648-53.
- 482 68. De Francesco V, Margiotta M, Zullo A *et al.* Prevalence of primary clarithromycin resistance in *Helicobacter*  
483 *pylori* strains over a 15 year period in Italy. *J Antimicrob Chemother* 2007;59:783-5.
- 484 69. Thung I, Aramin H, Vavinskaya V *et al.* Review article: the global emergence of *Helicobacter pylori* antibiotic  
485 resistance. *Aliment Pharmacol Ther* 2016;43:514-33.
- 486 70. Ierardi E, Giorgio F, Losurdo G *et al.* How antibiotic resistances could change *Helicobacter pylori* treatment: A  
487 matter of geography? *World J Gastroenterol* 2013;19:8168-80.
- 488 71. Hirata K, Suzuki H, Nishizawa T *et al.* Contribution of efflux pumps to clarithromycin resistance in *Helicobacter*  
489 *pylori*. *J Gastroenterol Hepatol* 2010;25 Suppl 1:S75-9.
- 490 72. Jaka H, Rhee JA, Östlundh L *et al.* The magnitude of antibiotic resistance to *Helicobacter pylori* in Africa and  
491 identified mutations which confer resistance to antibiotics: systematic review and meta-analysis. *BMC Infect Dis*  
492 2018;18:193.
- 493 73. Regnath T, Raecke O, Enninger A *et al.* Increasing metronidazole and rifampicin resistance of *Helicobacter pylori*  
494 isolates obtained from children and adolescents between 2002 and 2015 in southwest Germany. *Helicobacter*  
495 2017;22.
- 496 74. Boyanova L. Prevalence of multidrug-resistant *Helicobacter pylori* in Bulgaria. *J Med Microbiol* 2009;58:930-5.

- 497 75. Thyagarajan SP, Ray P, Das BK *et al.* Geographical difference in antimicrobial resistance pattern of *Helicobacter*  
498 *pylori* clinical isolates from Indian patients: *Multicentric study. J Gastroenterol Hepatol* 2003;18:1373-8.
- 499 76. van Doorn LJ, Schneeberger PM, Nouhan N *et al.* Importance of *Helicobacter pylori cagA* and *vacA* status for the  
500 efficacy of antibiotic treatment. *Gut* 2000;46:321-6.
- 501 77. Rudi J, Reuther S, Sieg A *et al.* Relevance of underlying disease and bacterial *vacA* and *cagA* status on the efficacy  
502 of *Helicobacter pylori* eradication. *Digestion* 2002;65:11-5.
- 503 78. Sugimoto M, Yamaoka Y. Virulence factor genotypes of *Helicobacter pylori* affect cure rates of eradication  
504 therapy. *Arch Immunol Ther Exp* 2009;57:45-56.
- 505 79. Alarcon-Millan J, Fernandez-Tilapa G, Cortes-Malagon EM *et al.* Clarithromycin resistance and prevalence of  
506 *Helicobacter pylori* virulent genotypes in patients from Southern Mexico with chronic gastritis. *Infect Genet Evol*  
507 2016;44:190-8.
- 508 80. Karabiber H, Selimoglu MA, Otlu B *et al.* Virulence factors and antibiotic resistance in children with *Helicobacter*  
509 *pylori* gastritis. *J Pediatr Gastroenterol Nutr* 2014;58:608-12.
- 510 81. Rasheed F, Campbell BJ, Alfizah H *et al.* Analysis of clinical isolates of *Helicobacter pylori* in Pakistan reveals  
511 high degrees of pathogenicity and high frequencies of antibiotic resistance. *Helicobacter* 2014;19:387-99.
- 512 82. Sicinschi LA, Correa P, Peek RM *et al.* CagA C-terminal variations in *Helicobacter pylori* strains from Colombian  
513 patients with gastric precancerous lesions. *Clin Microbiol Infect* 2010;16:369-78.
- 514 83. De Francesco V, Margiotta M, Zullo A *et al.* Claritromycin resistance and *Helicobacter pylori* genotypes in Italy.  
515 *J Microbiol* 2006;44:660-4.
- 516 84. Elviss NC, Owen RJ, Xerry J *et al.* *Helicobacter pylori* antibiotic resistance patterns and genotypes in adult  
517 dyspeptic patients from a regional population in North Wales. *J Antimicrob Chemother* 2004;54:435-40.
- 518

519 **Table 1. Oligonucleotide primer sequences used for amplification of genes involved in *H. pylori* antibiotic resistance.**

| Target gene | Primer designation | Oligonucleotide sequence (5'-3') | Annealing temperature (°C) | PCR product (bp) | Reference |
|-------------|--------------------|----------------------------------|----------------------------|------------------|-----------|
| <i>frxA</i> | frx1               | TGGATATGGCAGCCGTTTA              | 52                         | 729              | Han 2007  |
|             | frx2               | GGTTATCAAAAAGCTAACAGCG           |                            |                  |           |
| <i>rdxA</i> | rdx1               | ATGGTAATTGTTTCGTTAGGG            | 48                         | 758              | Han 2007  |
|             | rdx2               | CTCCTTGAACTTTAATTTAG             |                            |                  |           |
| <i>gyrA</i> | gyrAPF             | AGCTTATTCCATGAGCGTGA             | 52                         | 582              | Wang 2010 |
|             | gyrAPR             | TCAGGCCCTTGACAAATTC              |                            |                  |           |
| <i>gyrB</i> | gyrBPF             | CCCTAACGAAGCCAAAATCA             | 51                         | 465              | Wang 2010 |
|             | gyrBPR             | GGGCGCAAATAACGATAGAA             |                            |                  |           |
| 23S rRNA    | Hp23-1             | CCACAGCGATGTGGTCTCAG             | 54                         | 425              | Ho 2010   |
|             | Hp23-2             | CTCCATAAGAGCCAAAGCCC             |                            |                  |           |

520

521

522 **Table 2. Distribution of the antibiotic resistance patterns, MIC range, MIC<sub>50</sub> and MIC<sub>90</sub> values for each**  
 523 **antibiotic among *H. pylori* isolates used in this study.**

| Antibiotic agents | MIC range | MIC <sub>50</sub> | MIC <sub>90</sub> | No. (%) of MIC (mg/L) |            |
|-------------------|-----------|-------------------|-------------------|-----------------------|------------|
|                   |           |                   |                   | Susceptible           | Resistance |
| MNZ               | 0.25-128  | 32                | 128               | 6 (18.2)              | 27 (81.8)  |
| CLR <sup>a</sup>  | 0.06-16   | 1                 | 16                | 18 (54.5)             | 12 (36.4)  |
| AMX               | 0.03-0.5  | 0.25              | 0.5               | 23 (69.7)             | 10 (30.3)  |
| CIP               | 0.06-32   | 2                 | 16                | 21 (63.6)             | 12 (36.4)  |
| LEV               | 0.03-32   | 2                 | 16                | 24 (72.7)             | 9 (27.3)   |
| RIF               | 0.03-32   | 2                 | 16                | 23 (69.7)             | 10 (30.3)  |
| TCN               | 0.06-16   | 16                | >16               | 31 (93.9)             | 2 (6.1)    |

524 MNZ, metronidazole; CLR, clarithromycin; AMX, amoxicillin; CIP, ciprofloxacin; LEV, levofloxacin; RIF,  
 525 rifampicin; TCN, tetracycline

526 <sup>a</sup>Three (9.1%) *H. pylori* isolates had intermediate susceptibility against clarithromycin based on CLSI  
 527 breakpoints (MIC values equal to 0.5 mg/L)

528

529 **Table 3. Distribution of MIC values for each antibiotic among *H. pylori* isolates used in this study.**

| MIC (mg/L) | No. (%)  |           |           |          |          |          |           |
|------------|----------|-----------|-----------|----------|----------|----------|-----------|
|            | MNZ      | CLR       | AMX       | CIP      | LEV      | RIF      | TCN       |
| 0.03       |          |           | 11 (33.3) |          | 3 (9.1)  | 3 (9.1)  |           |
| 0.06       |          | 10 (30.3) | 10 (30.3) | 1 (3)    | 9 (27.3) | 5 (15.2) | 8 (24.2)  |
| 0.12       |          | 6 (18.2)  | 2 (6.1)   | 7 (21.2) | 5 (15.2) | 6 (18.2) | 10 (30.3) |
| 0.25       | 3 (9.1)  | 2 (6.1)   | 5 (15.2)  | 6 (18.2) | 1 (3)    | 2 (6.1)  | 5 (15.2)  |
| 0.5        |          | 3 (9.1)   | 5 (15.2)  | 3 (9.1)  | 5 (15.2) | 5 (15.2) | 5 (15.2)  |
| 1          | 2 (6.1)  | 3 (9.1)   |           | 4 (12.1) | 1 (3)    | 2 (6.1)  | 3 (9.1)   |
| 2          |          | 4 (12.1)  |           | 4 (12.1) | 1 (3)    | 3 (9.1)  |           |
| 4          |          | 1 (3)     |           | 1 (3)    |          | 1 (3)    |           |
| 8          | 2 (6.1)  |           |           |          |          | 2 (6.1)  |           |
| 16         | 7 (21.2) | 4 (12.1)  |           | 6 (18.2) |          | 2 (6.1)  |           |
| 32         | 6 (18.2) |           |           | 1 (3)    |          | 2 (6.1)  |           |
| 64         | 8 (24.2) |           |           |          |          |          |           |
| 128        | 5 (15.2) |           |           |          |          |          |           |
| 256        |          |           |           |          |          |          |           |

530 MNZ, metronidazole; CLR, clarithromycin; AMX, amoxicillin; CIP, ciprofloxacin; LEV, levofloxacin,  
 531 RIF, rifampicin; TCN, tetracycline

532

533 **Table 4. Distribution of the multidrug resistance profiles in relation to clinical outcomes**  
 534 **among *H. pylori* isolates used in this study.**

| Resistance profiles       | Clinical outcome |                 |               | Total<br>No. (%) |
|---------------------------|------------------|-----------------|---------------|------------------|
|                           | CG<br>(n = 14)   | PUD<br>(n = 12) | IM<br>(n = 6) |                  |
| <b>Single drugs</b>       |                  |                 |               |                  |
| CLR                       | 0                | 1               | 0             | 1 (3.1)          |
| AMX                       | 1                | 0               | 0             | 1 (3.1)          |
| RIF                       | 1                | 0               | 0             | 1 (3.1)          |
| CIP                       | 0                | 1               | 0             | 1 (3.1)          |
| MNZ                       | 3                | 2               | 0             | 5 (15.6)         |
| <b>Double drugs</b>       |                  |                 |               |                  |
| MNZ + AMX                 | 1                | 1               | 0             | 2 (6.2)          |
| MNZ + RIF                 | 1                | 0               | 1             | 2 (6.2)          |
| CIP + RIF                 | 1                | 0               | 0             | 1 (3.1)          |
| MNZ + CIP                 | 0                | 1               | 0             | 1 (3.1)          |
| <b>Triple drugs</b>       |                  |                 |               |                  |
| MNZ + CLR + LEV           | 0                | 1               | 1             | 2 (6.2)          |
| MNZ + AMX + RIF           | 1                | 1               | 0             | 2 (6.2)          |
| MNZ + CLR + CIP           | 1                | 1               | 1             | 3 (9.4)          |
| MNZ + CLR + AMX           | 0                | 0               | 1             | 1 (3.1)          |
| MNZ + AMX + CIP/LEV       | 0                | 1               | 0             | 1 (3.1)          |
| MNZ + RIF + CIP/LEV       | 2                | 0               | 0             | 2 (6.2)          |
| <b>Quadruple drugs</b>    |                  |                 |               |                  |
| MNZ + CLR + AMX + LEV     | 0                | 1               | 0             | 1 (3.1)          |
| MNZ + CLR + AMX + CIP/LEV | 0                | 0               | 1             | 1 (3.1)          |
| MNZ + CLR + TCN + LEV     | 1                | 0               | 0             | 1 (3.1)          |
| MNZ + TCN + RIF + LEV     | 0                | 0               | 1             | 1 (3.1)          |
| MNZ + CLR + AMX + CIP     | 0                | 1               | 0             | 1 (3.1)          |
| MNZ + CLR + CIP + RIF     | 1                | 0               | 0             | 1 (3.1)          |

535 MNZ, metronidazole; CLR, clarithromycin; AMX, amoxicillin; CIP, ciprofloxacin; LEV,  
 536 levofloxacin, RIF, rifampicin; TCN, tetracycline; CG, chronic gastritis; PUD, peptic ulcer disease;  
 537 IM, intestinal metaplasia

538



539 **Table 5. Number of nucleotide insertion and deletion in *frxA* and *rdxA* genes involved in metronidazole resistance among *H. pylori* isolates**  
 540 **used in this study.**

| Strains | Resistance phenotype | MIC (mg/L) | No. of nucleotide |                 | No. of nucleotide |                 | SDR/MDR        | Clinical Outcome |
|---------|----------------------|------------|-------------------|-----------------|-------------------|-----------------|----------------|------------------|
|         |                      |            | ins/del           | Mutation        | ins/del           | Mutation        |                |                  |
|         |                      |            | <i>frxA</i>       |                 | <i>rdxA</i>       |                 |                |                  |
| OC80    | Susceptible          | 0.25       | None <sup>a</sup> | In-frame        | None <sup>a</sup> | In-frame        | N <sup>c</sup> | CG               |
| OC112   | Resistant            | 32         | ND <sup>b</sup>   | ND <sup>b</sup> | None <sup>a</sup> | In-frame        | MDR            | CG               |
| HC114   | Resistant            | 16         | Ins (2)/Del (4)   | Frameshift      | None <sup>a</sup> | In-frame        | SDR            | PUD              |
| HC138   | Resistant            | 32         | Del (2)           | Frameshift      | None <sup>a</sup> | In-frame        | MDR            | PUD              |
| HC168   | Resistant            | 32         | Del (1)           | Frameshift      | ND <sup>b</sup>   | ND <sup>b</sup> | MDR            | PUD              |
| OC179   | Resistant            | 64         | ND <sup>b</sup>   | ND <sup>b</sup> | ND <sup>b</sup>   | ND <sup>b</sup> | SDR            | CG               |
| OC180   | Resistant            | 32         | Del (2)           | Frameshift      | Del (4)           | Frameshift      | MDR            | IM               |
| OC217   | Resistant            | 32         | Del (1)           | Frameshift      | Ins (1)           | Frameshift      | MDR            | CG               |
| OC218   | Susceptible          | 0.25       | ND <sup>b</sup>   | ND <sup>b</sup> | ND <sup>b</sup>   | ND <sup>b</sup> | SDR            | CG               |
| OC235   | Resistant            | 32         | Del (2)           | Frameshift      | Ins (9)           | Frameshift      | MDR            | PUD              |
| OC245   | Resistant            | 8          | ND <sup>b</sup>   | ND <sup>b</sup> | ND <sup>b</sup>   | ND <sup>b</sup> | MDR            | IM               |
| OC250   | Susceptible          | 1          | None <sup>a</sup> | In-frame        | None <sup>a</sup> | In-frame        | SDR            | PUD              |
| OC485   | Resistant            | 128        | Del (1)           | Frameshift      | None <sup>a</sup> | In-frame        | MDR            | CG               |
| OC494   | Susceptible          | 0.25       | None <sup>a</sup> | In-frame        | None <sup>a</sup> | In-frame        | MDR            | CG               |
| OC557   | Resistant            | 64         | Del (3)           | Frameshift      | None <sup>a</sup> | In-frame        | MDR            | PUD              |
| OC562   | Susceptible          | 8          | None <sup>a</sup> | In-frame        | None <sup>a</sup> | In-frame        | SDR            | CG               |
| OC571   | Resistant            | 64         | None <sup>a</sup> | In-frame        | None <sup>a</sup> | In-frame        | MDR            | CG               |
| OC576   | Resistant            | 64         | Del (1)           | Frameshift      | Q50Stop           | PTC             | SDR            | CG               |
| OC688   | Resistant            | 16         | Del (1)           | Frameshift      | Q50Stop           | PTC             | MDR            | IM               |
| OC797   | Resistant            | 16         | Del (1)           | Frameshift      | None <sup>a</sup> | In-frame        | MDR            | IM               |
| OC803   | Resistant            | 16         | None <sup>a</sup> | In-frame        | None <sup>a</sup> | In-frame        | MDR            | CG               |
| OC810   | Resistant            | 64         | None <sup>a</sup> | In-frame        | Del (1)           | Frameshift      | MDR            | CG               |
| OC824   | Resistant            | 128        | None <sup>a</sup> | In-frame        | Q50Stop           | PTC             | MDR            | PUD              |
| OC840   | Susceptible          | 1          | None <sup>a</sup> | In-frame        | None <sup>a</sup> | In-frame        | SDR            | PUD              |
| OC852   | Resistant            | 16         | ND <sup>b</sup>   | ND <sup>b</sup> | Ins (4)           | Frameshift      | MDR            | IM               |
| OC897   | Resistant            | 16         | None <sup>a</sup> | In-frame        | Ins (6)/Del (2)   | Frameshift      | SDR            | PUD              |
| OC912   | Resistant            | 16         | Del (1)           | Frameshift      | Del (1)           | Frameshift      | MDR            | PUD              |
| OC913   | Resistant            | 128        | Ins (3)/Del (1)   | Frameshift      | None <sup>a</sup> | In-frame        | MDR            | PUD              |
| OC937   | Resistant            | 128        | ND <sup>b</sup>   | ND <sup>b</sup> | Del (1)           | Frameshift      | SDR            | CG               |
| OC939   | Resistant            | 64         | Q5Stop            | PTC             | None <sup>a</sup> | In-frame        | MDR            | PUD              |
| OC975   | Resistant            | 64         | None <sup>a</sup> | In-frame        | ND <sup>b</sup>   | ND <sup>b</sup> | MDR            | IM               |
| OC985   | Resistant            | 64         | None <sup>a</sup> | In-frame        | Del (1)           | Frameshift      | MDR            | CG               |
| OC1031  | Resistant            | 128        | Ins (2)           | Frameshift      | Del (1)           | Frameshift      | MDR            | CG               |

541 Ins, nucleotide insertion; Del, nucleotide deletion; PTC, premature termination codon; SDR, single-drug resistance; MDR, multidrug resistance; CG,  
 542 chronic gastritis; PUD, peptic ulcer disease; IM, intestinal metaplasia

543 <sup>a</sup>None, no specific variation detected as compared with genes or amino acids from metronidazole-sensitive *H. pylori* isolates

544 <sup>b</sup>ND, not determined (the obtained sequence was not appropriate for mutational analysis)

545 <sup>c</sup>N, not resistant to all antibiotics tested

546

547 **Table 6. Mutations in *gyrA* and *gyrB* genes involved in fluoroquinolone resistance among *H. pylori* isolates used in this study.**

| Strains            | Resistance phenotype<br>CIP/LEV | MIC (mg/L) |      | Mutations                  |                   | SDR/MDR        | Clinical<br>Outcome |
|--------------------|---------------------------------|------------|------|----------------------------|-------------------|----------------|---------------------|
|                    |                                 | CIP        | LEV  | <i>gyrA</i>                | <i>gyrB</i>       |                |                     |
| OC80               | Susceptible/Susceptible         | 0.5        | 0.06 | M191I, V199A, G208E        | D481E             | N <sup>c</sup> | CG                  |
| OC112              | Susceptible/Susceptible         | 0.25       | 0.25 | M191I, G208E               | None <sup>a</sup> | MDR            | CG                  |
| HC114              | Susceptible/Susceptible         | 0.12       | 0.12 | M191I, G208E               | None <sup>a</sup> | SDR            | PUD                 |
| HC138              | Resistant/Susceptible           | 16         | 0.5  | V150A, M191I, G208E        | None <sup>a</sup> | MDR            | PUD                 |
| HC168              | Susceptible/Susceptible         | 0.25       | 0.06 | D143E, G208K, I212S, E214K | ND <sup>b</sup>   | MDR            | PUD                 |
| OC179              | Susceptible/Susceptible         | 0.5        | 0.06 | M191I, V199A, G208A        | ND <sup>b</sup>   | SDR            | CG                  |
| OC180              | Susceptible/Susceptible         | 0.12       | 0.06 | V150A, M191I, V199A, G208E | None <sup>a</sup> | MDR            | IM                  |
| OC217              | Susceptible/Susceptible         | 0.12       | 0.06 | M191I, G208E               | ND <sup>b</sup>   | MDR            | CG                  |
| OC218              | Susceptible/Susceptible         | 0.12       | 0.06 | ND <sup>b</sup>            | ND <sup>b</sup>   | SDR            | CG                  |
| OC235              | Susceptible/Susceptible         | 0.25       | 0.06 | D86N, M191I, G208E         | None <sup>a</sup> | MDR            | PUD                 |
| OC245              | Resistant/Resistant             | 16         | 16   | M191I, V199A, G208A        | None <sup>a</sup> | MDR            | IM                  |
| OC250 <sup>d</sup> | Resistant/Susceptible           | 16         | 0.5  | D86G, M191I                | None <sup>a</sup> | SDR            | PUD                 |
| OC485 <sup>d</sup> | Resistant/Susceptible           | 2          | 0.12 | D86N, A183V, M191I         | None <sup>a</sup> | MDR            | CG                  |
| OC494 <sup>d</sup> | Resistant/Susceptible           | 32         | 0.5  | None <sup>a</sup>          | None <sup>a</sup> | MDR            | CG                  |
| OC557              | Susceptible/Resistant           | 0.12       | 16   | V199A, G208E               | None <sup>a</sup> | MDR            | PUD                 |
| OC562              | Susceptible/Susceptible         | 1          | 0.12 | D86G, M191I, A207T, G208E  | ND <sup>b</sup>   | SDR            | CG                  |
| OC571              | Resistant/Resistant             | 16         | 16   | D86G, M191I, V199A, G208E  | None <sup>a</sup> | MDR            | CG                  |
| OC576              | Susceptible/Susceptible         | 0.06       | 0.5  | V199A, G208E               | D481E             | SDR            | CG                  |
| OC688              | Susceptible/Susceptible         | 1          | 1    | M191I, V199A, G208E        | None <sup>a</sup> | MDR            | IM                  |
| OC797              | Resistant/Susceptible           | 2          | 0.03 | M191I, V199A, G208E        | D481E, R484K      | MDR            | IM                  |
| OC803              | Resistant/Susceptible           | 2          | 0.03 | S63P, M191I, V199A, G208E  | None <sup>a</sup> | MDR            | CG                  |
| OC810              | Susceptible/Resistant           | 1          | 32   | M191I, G208E               | None <sup>a</sup> | MDR            | CG                  |
| OC824              | Resistant/Resistant             | 16         | 16   | M191I, G208E               | D481E, R484K      | MDR            | PUD                 |
| OC840              | Susceptible/Susceptible         | 1          | 0.06 | G208E                      | None <sup>a</sup> | SDR            | PUD                 |
| OC852              | Susceptible/Resistant           | 0.5        | 2    | M191I, G208E               | D481E, R484K      | MDR            | IM                  |
| OC897              | Susceptible/Susceptible         | 0.25       | 0.03 | A97V, G208E                | None <sup>a</sup> | SDR            | PUD                 |
| OC912              | Resistant/Susceptible           | 2          | 0.12 | G208E                      | D481E, R484K      | MDR            | PUD                 |
| OC913              | Susceptible/Resistant           | 0.25       | 16   | M191I, G208E               | D481E, R484K      | MDR            | PUD                 |
| OC937              | Susceptible/Susceptible         | 0.12       | 0.5  | G208E                      | None <sup>a</sup> | SDR            | CG                  |
| OC939              | Resistant/Susceptible           | 4          | 0.12 | M191I, G208E               | None <sup>a</sup> | MDR            | PUD                 |
| OC975              | Susceptible/Resistant           | 0.25       | 16   | D86N, R140K, M191I, G208E  | None <sup>a</sup> | MDR            | IM                  |
| OC985              | Susceptible/Susceptible         | 0.12       | 0.06 | ND <sup>b</sup>            | None <sup>a</sup> | MDR            | CG                  |
| OC1031             | Resistant/Resistant             | 16         | 16   | D86N, M191I, G208E         | ND <sup>b</sup>   | MDR            | CG                  |

548 CIP, ciprofloxacin; LEV, levofloxacin; SDR, single-drug resistance; MDR, multidrug resistance; CG, chronic gastritis; PUD, peptic ulcer disease; IM,  
549 intestinal metaplasia

550<sup>a</sup>None, no specific variation detected as compared with genes or amino acids from fluoroquinolone-sensitive *H. pylori* isolates

551<sup>b</sup>ND, not determined (the obtained sequence was not appropriate for mutational analysis)

552<sup>c</sup>N, not resistant to all antibiotics tested

553<sup>d</sup>The *gyrA* quinolone-resistant determining regions of the strains OC250, OC485 and OC494 were partially translated due to low quality of obtained sequences

554

555  
556

**Table 7. Mutations in 23S rRNA gene involved in clarithromycin resistance among *H. pylori* isolates used in this study.**

| Strains | Resistance phenotype | MIC (mg/L) | Mutations         | SDR/MDR        | Clinical Outcome |
|---------|----------------------|------------|-------------------|----------------|------------------|
| OC80    | Susceptible          | 0.062      | None <sup>a</sup> | N <sup>c</sup> | CG               |
| OC112   | Susceptible          | 0.125      | ND <sup>b</sup>   | MDR            | CG               |
| HC114   | Susceptible          | 0.062      | None <sup>a</sup> | SDR            | PUD              |
| HC138   | Resistant            | 16         | None <sup>a</sup> | MDR            | PUD              |
| HC168   | Susceptible          | 0.062      | None <sup>a</sup> | MDR            | PUD              |
| OC179   | Susceptible          | 0.062      | ND <sup>b</sup>   | SDR            | CG               |
| OC180   | Resistant            | 16         | A2143G            | MDR            | IM               |
| OC217   | Susceptible          | 0.062      | ND <sup>b</sup>   | MDR            | CG               |
| OC218   | Susceptible          | 0.25       | ND <sup>b</sup>   | SDR            | CG               |
| OC235   | Intermediate         | 0.5        | None <sup>a</sup> | MDR            | PUD              |
| OC245   | Resistant            | 16         | ND <sup>b</sup>   | MDR            | IM               |
| OC250   | Susceptible          | 0.25       | None <sup>a</sup> | SDR            | PUD              |
| OC485   | Resistant            | 2          | None <sup>a</sup> | MDR            | CG               |
| OC494   | Susceptible          | 0.062      | None <sup>a</sup> | MDR            | CG               |
| OC557   | Resistant            | 2          | C2195T            | MDR            | PUD              |
| OC562   | Intermediate         | 0.5        | ND <sup>b</sup>   | SDR            | CG               |
| OC571   | Susceptible          | 0.25       | None <sup>a</sup> | MDR            | CG               |
| OC576   | Susceptible          | 0.125      | ND <sup>b</sup>   | SDR            | CG               |
| OC688   | Susceptible          | 0.125      | None <sup>a</sup> | MDR            | IM               |
| OC797   | Resistant            | 16         | None <sup>a</sup> | MDR            | IM               |
| OC803   | Resistant            | 1          | ND <sup>b</sup>   | MDR            | CG               |
| OC810   | Resistant            | 2          | C2195T            | MDR            | CG               |
| OC824   | Susceptible          | 0.062      | None <sup>a</sup> | MDR            | PUD              |
| OC840   | Resistant            | 1          | A2143G            | SDR            | PUD              |
| OC852   | Resistant            | 2          | ND <sup>b</sup>   | MDR            | IM               |
| OC897   | Susceptible          | 0.062      | None <sup>a</sup> | SDR            | PUD              |
| OC912   | Intermediate         | 0.5        | None <sup>a</sup> | MDR            | PUD              |
| OC913   | Susceptible          | 0.125      | None <sup>a</sup> | MDR            | PUD              |
| OC937   | Susceptible          | 0.125      | None <sup>a</sup> | SDR            | CG               |
| OC939   | Resistant            | 4          | None <sup>a</sup> | MDR            | PUD              |
| OC975   | Susceptible          | 0.125      | None <sup>a</sup> | MDR            | IM               |
| OC985   | Susceptible          | 0.125      | None <sup>a</sup> | MDR            | CG               |
| OC1031  | Susceptible          | 0.062      | None <sup>a</sup> | MDR            | CG               |

557 SDR, single-drug resistance; MDR, multidrug resistance; CG, chronic gastritis; PUD, peptic ulcer disease; IM,  
558 intestinal metaplasia

559 <sup>a</sup>None, no specific variation detected as compared with genes from clarithromycin-sensitive *H. pylori* isolates

560 <sup>b</sup>ND, not determined (the obtained sequence was not appropriate for mutational analysis)

561 <sup>c</sup>N, not resistant to all antibiotics tested

562

**Table 8. Frequency and distribution of virulence genotypes in relation to antibiotic resistance patterns among *H. pylori* isolates used in this study.**

| Virulence Genotypes           | Resistance No. (%) |           |           |         |           |            |           |           |           |           |           |           |                        |           | Total No. (%) |              |
|-------------------------------|--------------------|-----------|-----------|---------|-----------|------------|-----------|-----------|-----------|-----------|-----------|-----------|------------------------|-----------|---------------|--------------|
|                               | MNZ                |           | CLR       |         |           | AMX        |           | CIP       |           | LEV       |           | RIF       |                        | TCN       |               |              |
|                               | S                  | R         | S         | I       | R         | S          | R         | S         | R         | S         | R         | S         | R                      | S         |               | R            |
| <i>cagL</i> <sup>+</sup>      | 6 (18.2)           | 26 (78.8) | 15 (45.4) | 3 (9.1) | 12 (36.4) | 22 (66.7)  | 10 (30.3) | 20 (60.6) | 12 (36.4) | 23 (69.7) | 9 (27.3)  | 22 (66.7) | 10 (30.3)              | 30 (90.9) | 2 (6.1)       | 32/33 (97)   |
| <i>cagL</i> <sup>-</sup>      | 0                  | 1 (3)     | 3 (9.1)   | 0       | 0         | 1 (3)      | 0         | 1 (3)     | 0         | 1 (3)     | 0         | 1 (3)     | 0                      | 1 (3)     | 0             | 1/33 (3)     |
| <i>cagA</i> <sup>+</sup>      | 4 (12.1)           | 25 (75.7) | 15 (45.4) | 3 (9.1) | 11 (33.3) | 20 (60.6)  | 9 (27.2)  | 17 (51.5) | 12 (36.4) | 20 (60.6) | 9 (27.3)  | 19 (57.6) | 10 (30.3)              | 27 (81.8) | 2 (6.1)       | 29/33 (87.9) |
| <i>cagA</i> <sup>-</sup>      | 2 (6.1)            | 2 (6.1)   | 3 (9.1)   | 0       | 1 (3)     | 3 (9.1)    | 1 (3)     | 4 (12.1)  | 0         | 4 (12.1)  | 0         | 4 (12.1)  | 0                      | 4 (12.1)  | 0             | 4/33 (12.1)  |
| EPIYA motifs                  |                    |           |           |         |           |            |           |           |           |           |           |           |                        |           |               |              |
| ABC                           | 2 (6.9)            | 18 (62.1) | 9 (31)    | 2 (6.8) | 9 (31)    | 16 (55.2)  | 4 (13.8)  | 12 (41.4) | 8 (27.6)  | 13 (44.8) | 7 (24.1)  | 13 (44.8) | 7 (24.1)               | 18 (62.1) | 2 (6.9)       | 20/29 (69)   |
| ABCC                          | 1 (3.4)            | 1 (3.4)   | 2 (6.9)   | 0       | 0         | 0          | 2 (6.9)   | 1 (3.4)   | 1 (3.4)   | 1 (3.4)   | 1 (3.4)   | 2 (6.9)   | 0                      | 2 (6.9)   | 0             | 2/29 (6.9)   |
| ABCCC                         | 0                  | 1 (3.4)   | 0         | 0       | 1 (3.4)   | 0          | 1 (3.4)   | 0         | 1 (3.4)   | 1 (3.4)   | 0         | 1 (3.4)   | 0                      | 1 (3.4)   | 0             | 1/29 (3.4)   |
| Mixed type <sup>a</sup>       | 1 (3.4)            | 5 (17.2)  | 4 (13.8)  | 1 (3.4) | 1 (3.4)   | 4 (13.8)   | 2 (6.9)   | 4 (13.8)  | 2 (6.9)   | 5 (17.2)  | 1 (3.4)   | 3 (10.3)  | 3 (10.3)               | 6 (20.7)  | 0             | 6/29 (20.7)  |
| <i>vacA</i> alleles           |                    |           |           |         |           |            |           |           |           |           |           |           |                        |           |               |              |
| <i>vacA</i> s1m1              | 3 (9.1)            | 9 (27.3)  | 6 (18.2)  | 2 (6.1) | 4 (12.1)  | 9 (27.3)   | 3 (9.1)   | 7 (21.2)  | 5 (15.1)  | 10 (30.3) | 2 (6.1)   | 8 (24.2)  | 4 (12.1)               | 11 (33.3) | 1 (3)         | 12/33 (36.4) |
| <i>vacA</i> s1m2              | 2 (6.1)            | 14 (42.4) | 9 (27.3)  | 0       | 7 (21.2)  | 12 (36.4)  | 4 (12.1)  | 11 (33.3) | 5 (15.1)  | 11 (33.3) | 5 (15.1)  | 12 (36.4) | 4 (12.1)               | 15 (45.4) | 1 (3)         | 16/33 (48.5) |
| <i>vacA</i> s2m2              | 1 (3)              | 4 (12.1)  | 3 (9.1)   | 1 (3)   | 1 (3)     | 2 (6.1)    | 3 (9.1)   | 3 (9.1)   | 2 (6.1)   | 3 (9.1)   | 2 (6.1)   | 3 (9.1)   | 2 (6.1)                | 5 (15.1)  | 0             | 5/33 (15.1)  |
| Oip "on"                      | 4 (15.4)           | 19 (73.1) | 11 (42.3) | 2 (7.7) | 10 (38.5) | 18 (69.2)  | 5 (19.2)  | 13 (50)   | 10 (38.4) | 16 (61.5) | 7 (26.9)  | 16 (61.5) | 7 (26.9)               | 22 (84.6) | 1 (3.8)       | 23/26 (88.5) |
| Oip "off"                     | 0                  | 3 (11.5)  | 1 (3.8)   | 1 (3.8) | 1 (3.8)   | 1 (3.8)    | 2 (7.7)   | 3 (11.5)  | 0         | 2 (7.7)   | 1 (3.8)   | 2 (7.7)   | 1 (3.8)                | 2 (7.7)   | 1 (3.8)       | 3/26 (11.5)  |
| <i>babA2</i> <sup>+</sup>     | 6 (18.2)           | 27 (81.8) | 18 (54.5) | 3 (9.1) | 12 (36.4) | 23 (69.7)  | 10 (30.3) | 21 (63.6) | 12 (36.4) | 24 (72.7) | 9 (27.3)  | 23 (69.7) | 10 (30.3)              | 31 (93.9) | 2 (6.1)       | 33/33 (100)  |
| <i>sabA</i> <sup>+</sup>      | 4 (12.1)           | 23 (69.7) | 15 (45.4) | 2 (6.1) | 10 (30.3) | 19 (57.6)  | 8 (24.2)  | 17 (51.5) | 10 (30.3) | 7 (21.2)  | 20 (60.6) | 18 (54.5) | 9 (27.3)               | 25 (75.7) | 2 (6.1)       | 27/33 (81.8) |
| <i>sabA</i> <sup>-</sup>      | 2 (6.1)            | 4 (12.1)  | 3 (9.1)   | 1 (3)   | 2 (6.1)   | 4 (12.1)   | 2 (6.1)   | 4 (12.1)  | 2 (6.1)   | 2 (6.1)   | 4 (12.1)  | 5 (15.1)  | 1 (3)                  | 6 (18.2)  | 0             | 6/33 (18.2)  |
| <i>dupA</i> <sup>+</sup>      | 4 (12.1)           | 25 (75.7) | 16 (48.5) | 3 (9.1) | 10 (30.3) | 20 (60.6)  | 9 (27.3)  | 17 (53.1) | 12 (36.4) | 21 (63.6) | 8 (24.2)  | 20 (60.6) | 9 (27.3)               | 28 (84.8) | 1 (3)         | 29/33 (87.9) |
| <i>dupA</i> <sup>-</sup>      | 2 (6.1)            | 2 (6.1)   | 2 (6.1)   | 0       | 2 (6.1)   | 3 (9.1)    | 1 (3)     | 4 (12.1)  | 0         | 3 (9.1)   | 1 (3)     | 3 (9.1)   | 1 (3)                  | 3 (9.1)   | 1 (3)         | 4/33 (12.1)  |
| <i>cagPAI</i> integrity       |                    |           |           |         |           |            |           |           |           |           |           |           |                        |           |               |              |
| Intact <i>cagPAI</i>          | 3 (9.4)            | 18 (56.2) | 11 (34.4) | 2 (6.2) | 8 (25)    | 18 (56.2)* | 3 (9.4)   | 12 (37.5) | 9 (28.1)  | 16 (5)    | 5 (15.6)  | 8 (25)    | 13 (40.6) <sup>†</sup> | 19 (59.4) | 2 (6.2)       | 21/32 (65.6) |
| Partial <i>cagPAI</i>         | 3 (9.4)            | 8 (25)    | 6 (18.7)  | 1 (3.1) | 4 (12.5)  | 4 (12.5)   | 7 (21.9)  | 8 (25)    | 3 (9.4)   | 7 (21.9)  | 4 (12.5)  | 9 (28.1)  | 2 (6.2)                | 11 (34.4) | 0             | 11/32 (34.4) |
| Totally deleted <i>cagPAI</i> | 0                  | 1 (3)     | 1 (3)     | 0       | 0         | 1 (3)      | 0         | 1 (3)     | 0         | 1 (3)     | 0         | 1 (3)     | 0                      | 1 (3.03)  | 0             | 1/33 (3)     |

MNZ, metronidazole; CLR, clarithromycin; AMX, amoxicillin; CIP, ciprofloxacin; LEV, levofloxacin; RIF, rifampicin; TCN, tetracycline; S, susceptible; I, intermediate; R, resistant

<sup>a</sup>Denotes the presence of multiple *cagA* EPIYA motifs indicating mixed infections
